# Supplementary material for: ATMIN is required for the ATM-mediated signaling and recruitment of 53BP1 to DNA damage sites upon replication stress
Source: PubMed Central journal article supplement (PMC4251980; doi:10.1016/j.dnarep.2014.09.001), 2014-12

**A.**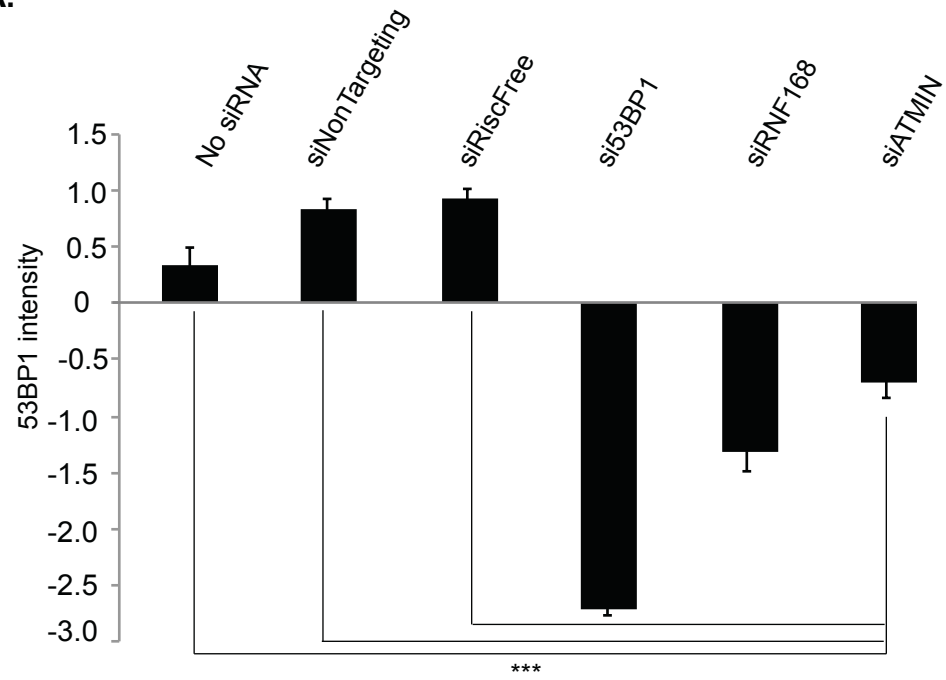**B.**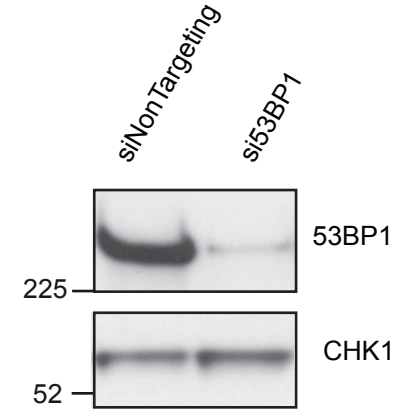**C.**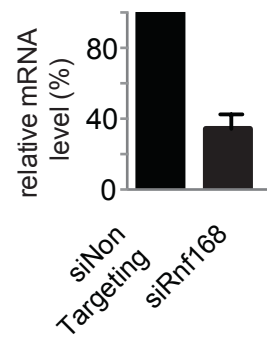

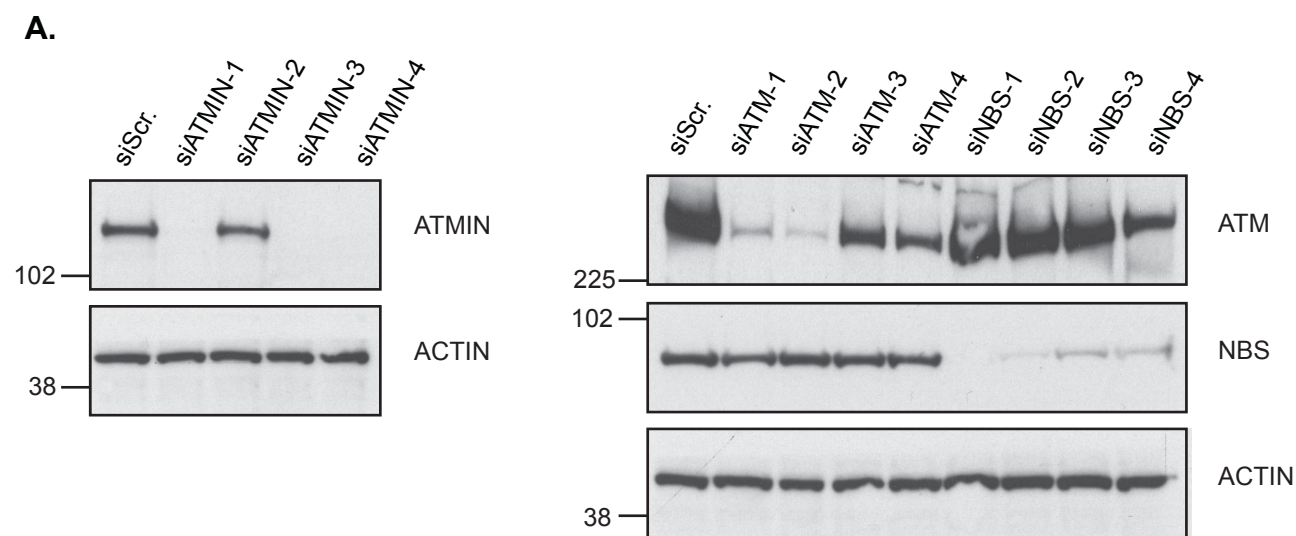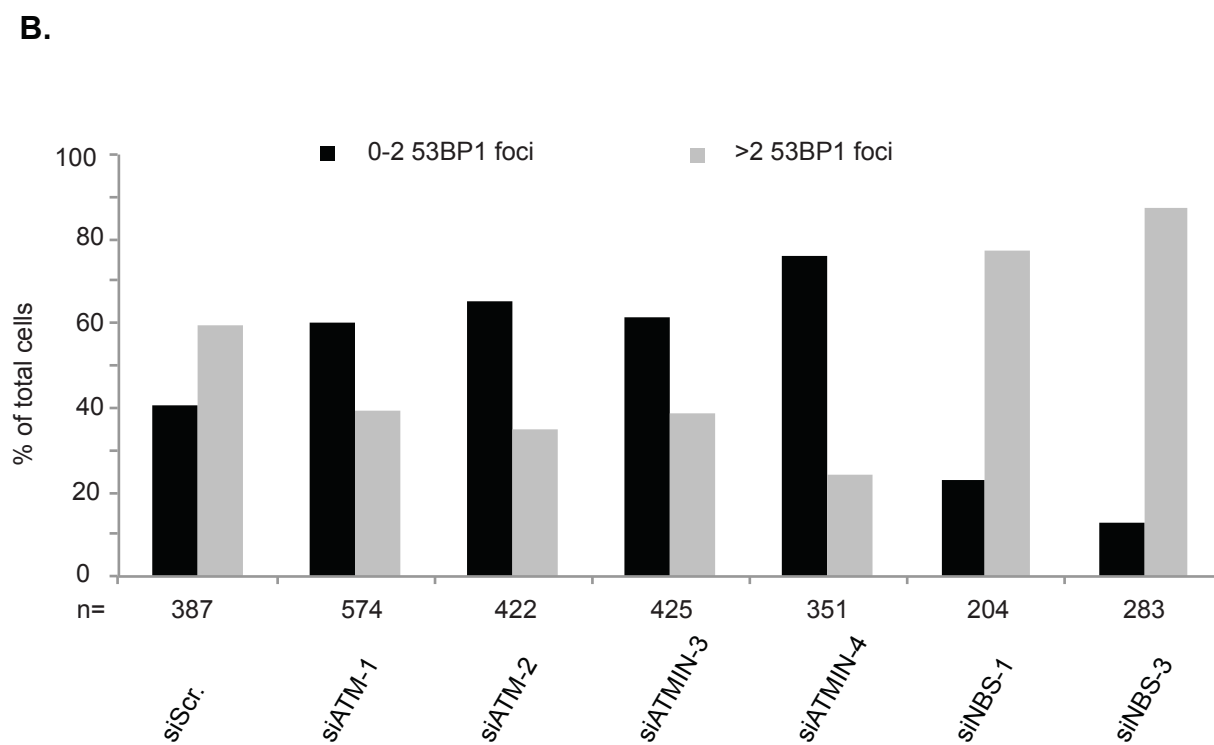

Supplementary Figure 2

**A.**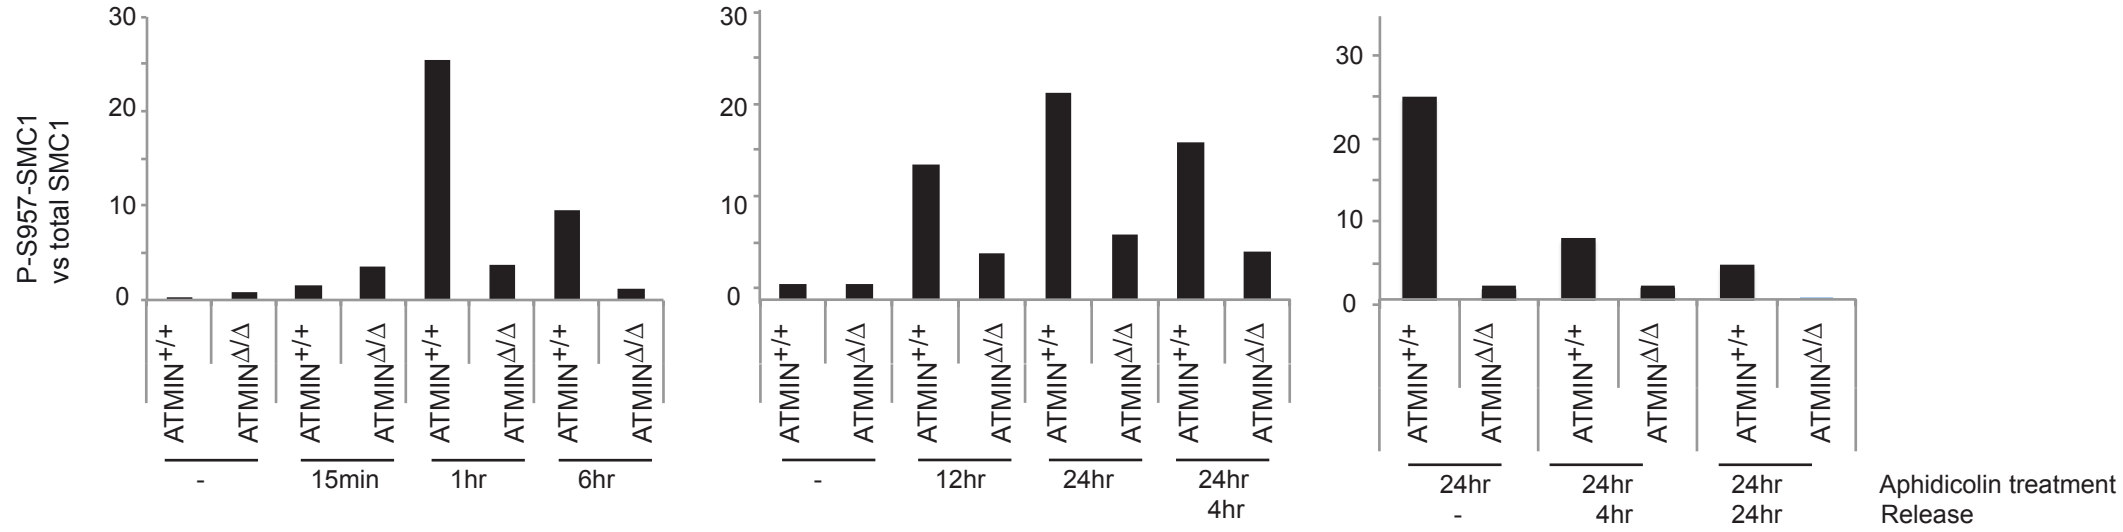**B.**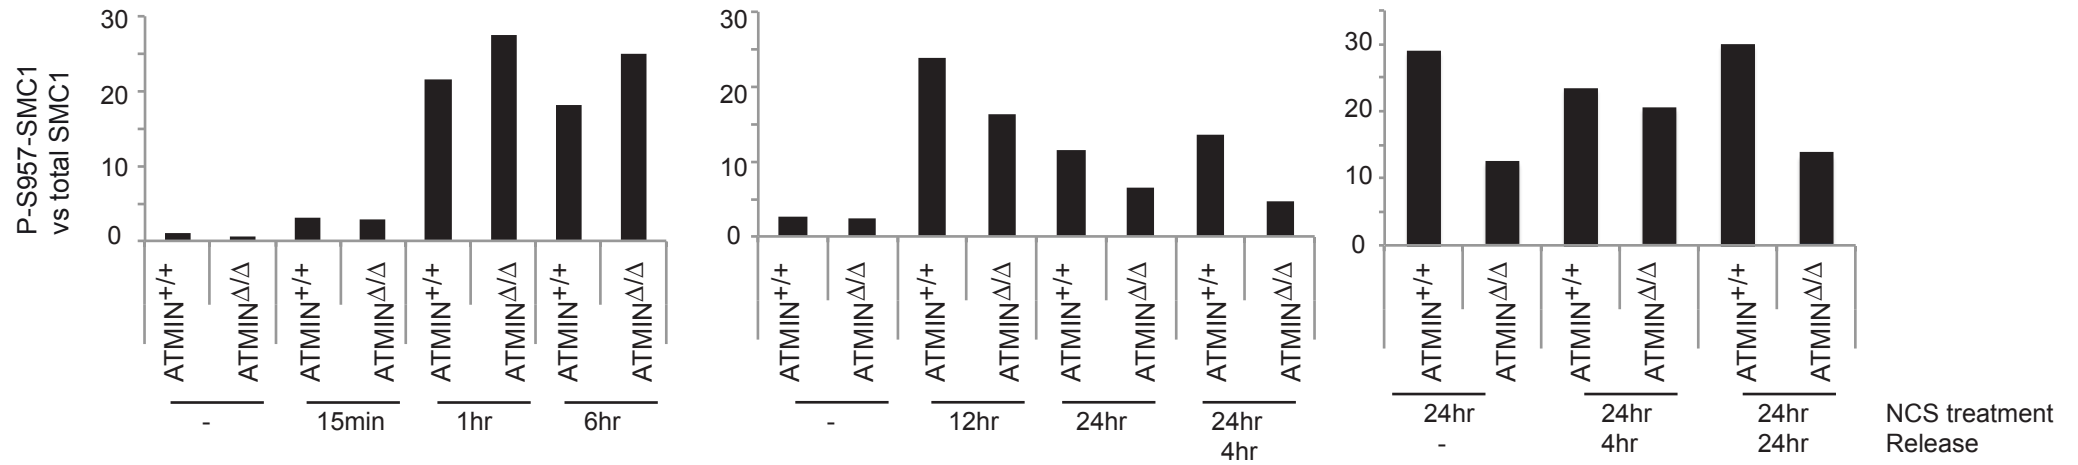

A.

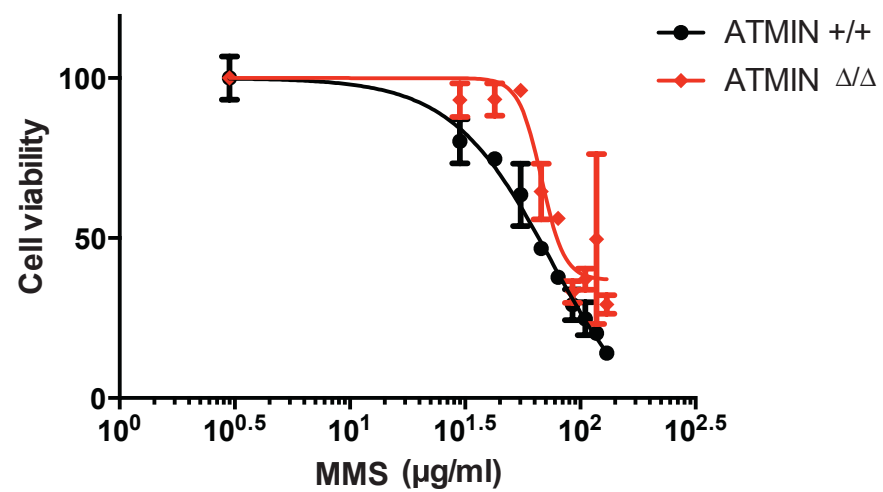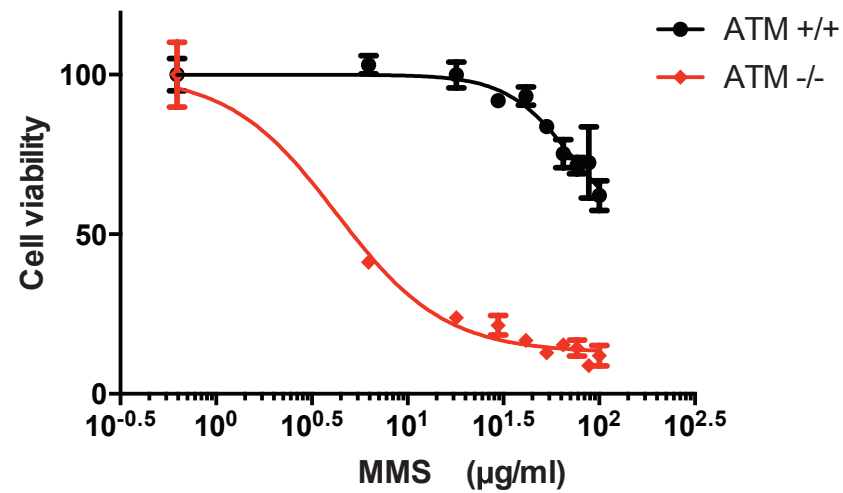

B.

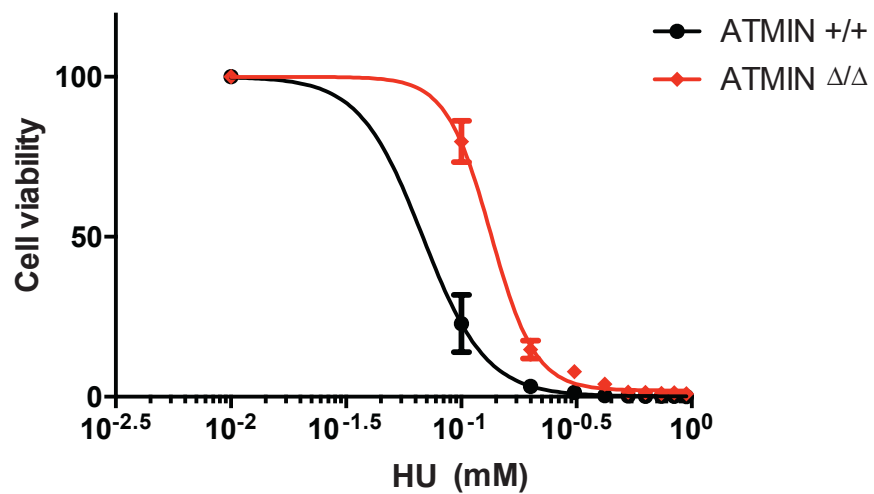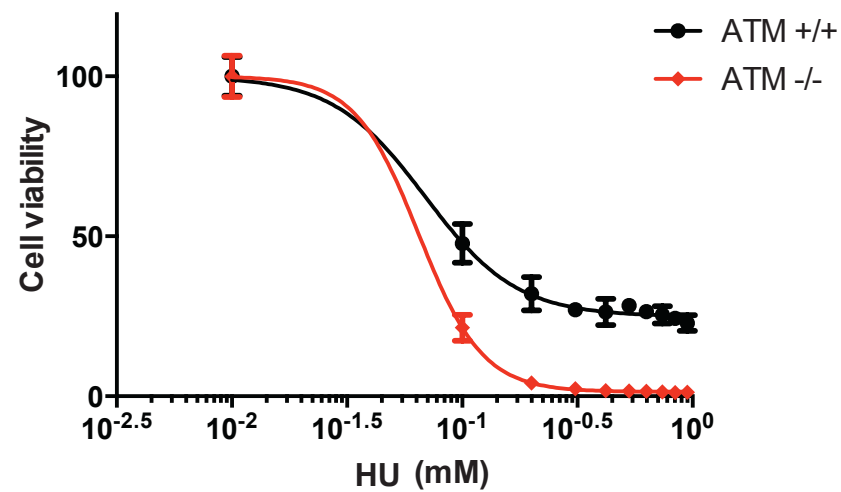

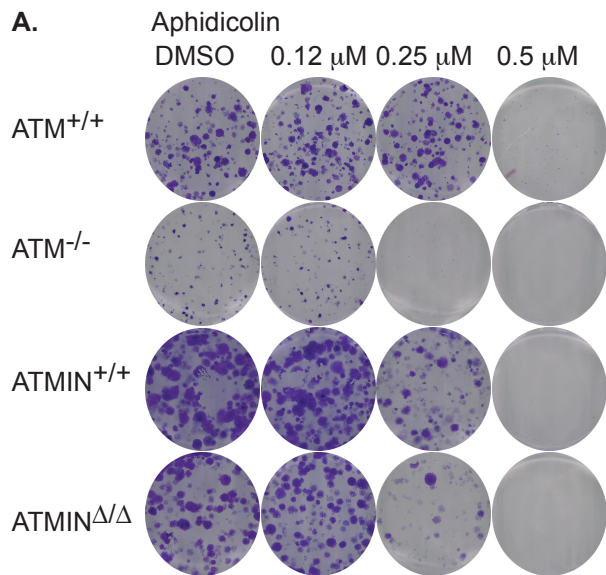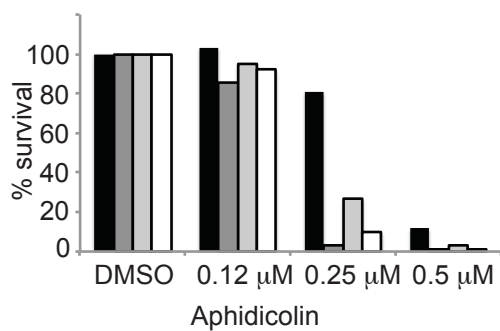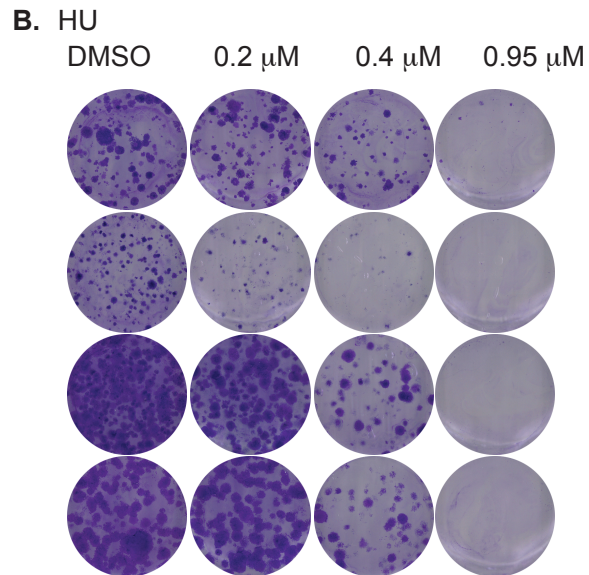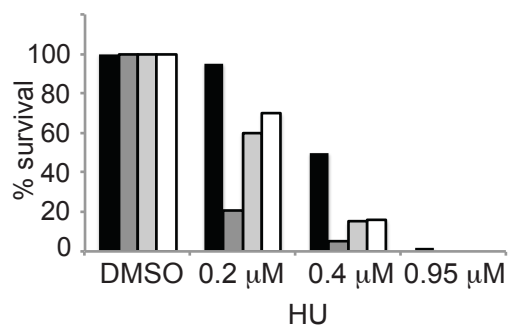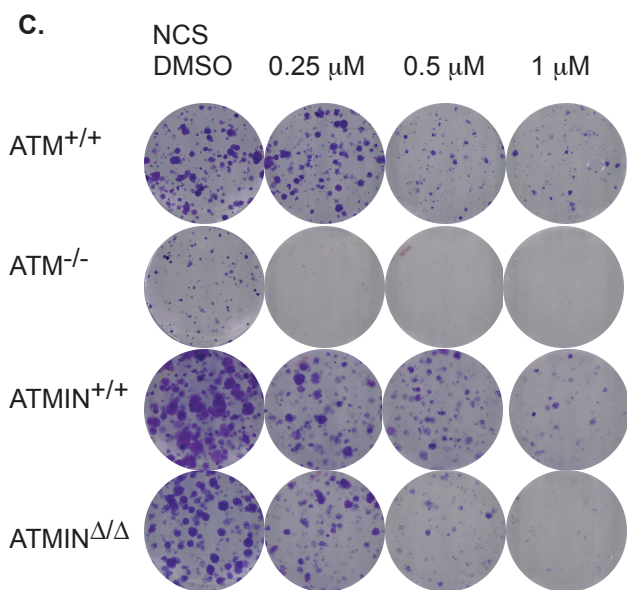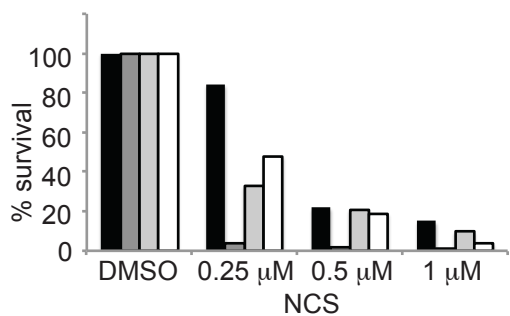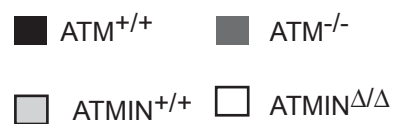

**A. Topotecan**

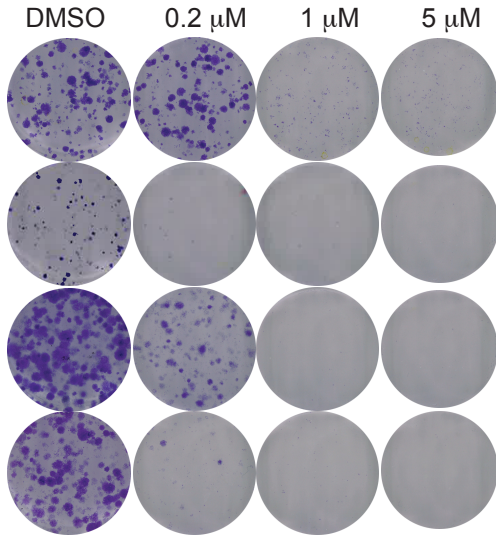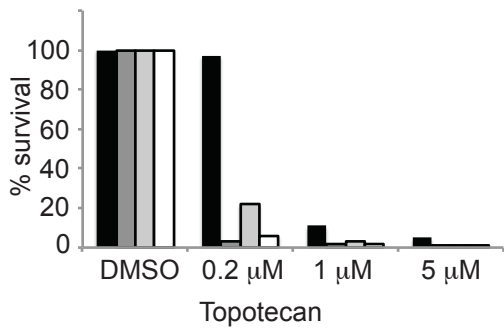

**B. MMS**

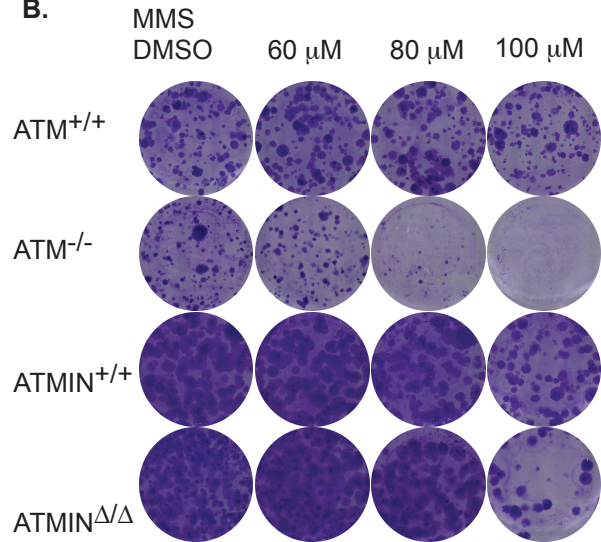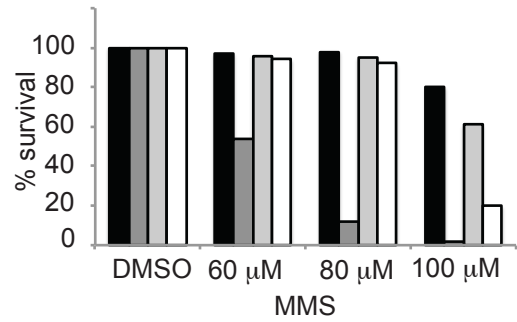

ATM<sup>+/+</sup>
 ATM<sup>-/-</sup>
 ATMIN<sup>+/+</sup>
 ATMIN<sup>Δ/Δ</sup>

**Supplementary Figure 6**

**A.**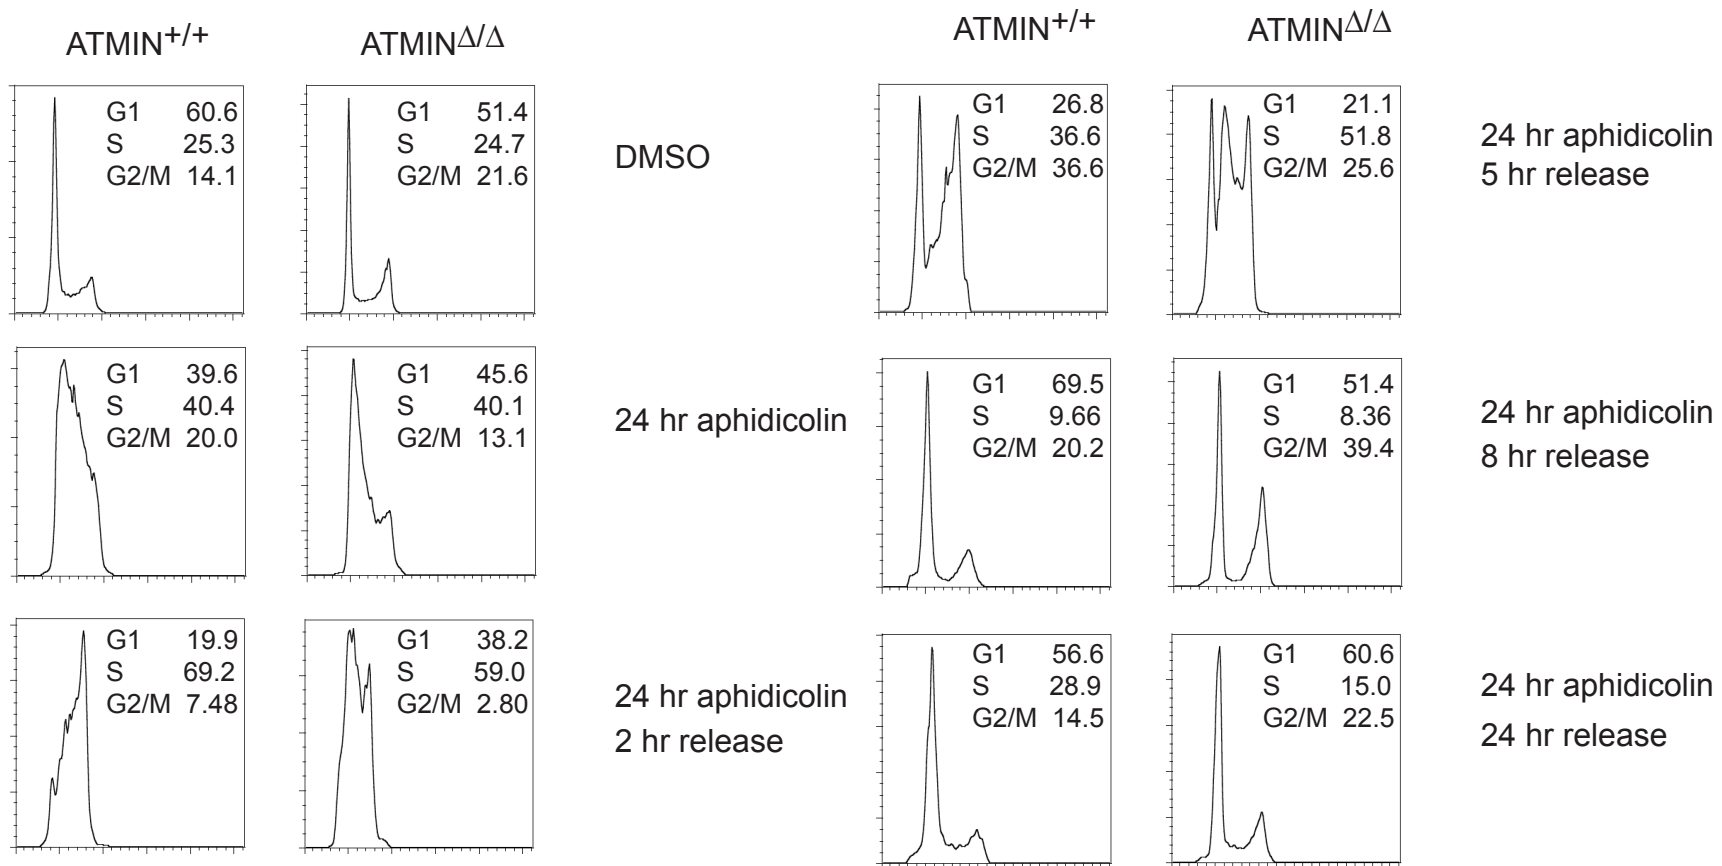**B.**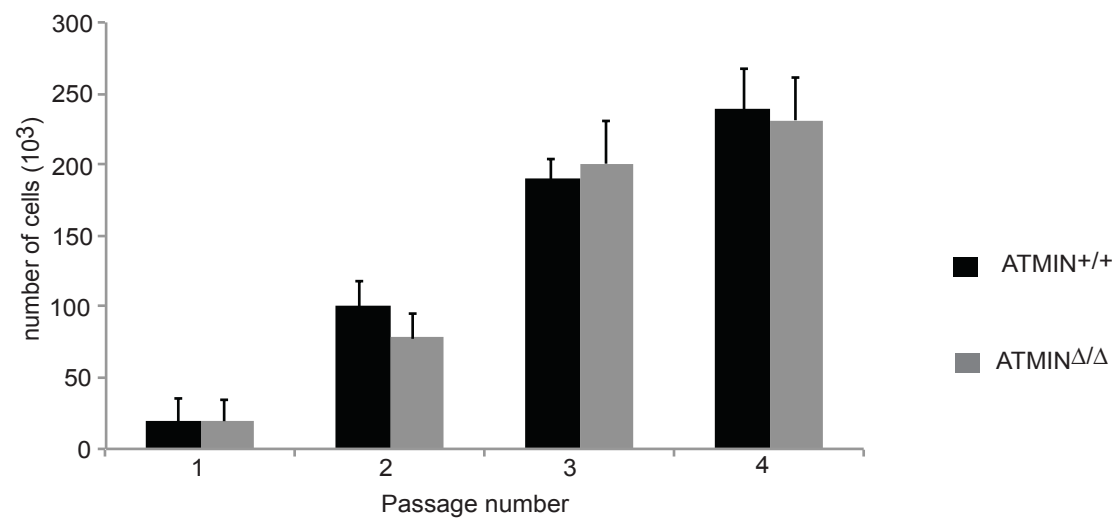

Supplement: mmc1.pdf [file mmc1.pdf]
